# Supplementary material for: Mitochondrial-Associated Cell Death Mechanisms Are Reset to an Embryonic-Like State in Aged Donor-Derived iPS Cells Harboring Chromosomal Aberrations
Source: PLoS One. 2011 Nov 14;6(11):e27352. doi: 10.1371/journal.pone.0027352 (PMC3215709; doi:10.1371/journal.pone.0027352)
Supplement: Table S2 — Complete gene list of chromosomal enrichments and chromosomal losses in all pluripotent stem cells. (XLS) [file pone.0027352.s009.xls]

## Sheet: Enrichment
	H1	iB4	iB5	iB5	iPS4	OiPS3	OiPS3	OiPS3	OiPS3	OiPS6	OiPS6	OiPS6	OiPS6	OiPS6	OiPS6	OiPS8	OiPS8	OiPS8	OiPS16	OiPS16	OiPS16
Location	12	19	19	16	16	19p13	19p	19	20	Xp22	X	20p	20q	20q13	20	12q	17	12	1	1q32	1q
Genes (N)	172	264	255	162	176	103	118	241	122	36	163	48	80	57	129	119	180	165	306	39	166
Raw p value	3.65e-31	1.72e-17	3.73e-14	2.57e-09	4.82e-10	8.67e-08	1.28e-09	1.33e-12	3.08e-12	5.36e-10	2.15e-10	1.78e-07	2.58e-09	1.06e-08	1.4e-14	7.3e-08	5.02e-09	6.93e-10	6.76e-11	2.52e-07	1.69e-10
Corrected p value	7.53e-28	4.14e-14	8.97e-11	4.41e-06	8.27e-07	6.66e-05	1.13e-06	3.2e-09	3.35e-09	1.12e-07	4.53e-07	6.35e-05	1.53e-06	4.05e-06	1.52e-11	9.19e-05	1.13e-05	1.43e-06	2.83e-07	6.89e-05	3.06e-07
Enrichment factor	2.58	1.66	1.58	1.57	1.57	1.68	1.74	1.55	1.88	3.01	1.62	2.16	1.96	2.17	1.98	1.63	1.53	1.6	1.42	2.37	1.63
Gene Symbol	TARBP2	SIGLEC6	HOOK2	CHTF18	SHCBP1	TNFSF14	TNFSF14	SLC27A5	TAF4	WWC3	VCX	SMOX	MMP24	TAF4	TAF4	SCARB1	C17orf69	SCARB1	VASH2	KLHL12	VASH2
	ATP5G2	SBNO2	ARID3A	HSD11B2	CHTF18	HOOK2	ARID3A	SIGLEC6	PLTP	PRPS2	KCNE1L	SEC23B	TAF4	RBM38	PLTP	HRK	HSD17B1	SILV	GTF2B	VASH2	HSD11B1
	LRIG3	HOOK2	ATP5D	CRYM	HSD11B2	ARID3A	HOOK2	HOOK2	SULF2	VCX	PLP1	XRN2	PLTP	PLTP	SULF2	SILV	SHMT1	TAC3	HSD11B1	ETNK2	CA14
	ERP29	ARID3A	CAPN12	ZSCAN10	ZSCAN10	LASS4	LASS4	ARID3A	CSE1L	SMS	PQBP1	SNAP25	SULF2	SULF2	CSE1L	TAC3	ATP5G1	CD9	SSBP3	HSD11B1	CD247
	GUCY2C	CAPN12	PBX4	GTF3C1	GTF3C1	PPAN-P2RY11	LASS1	TMEM59L	CDS2	PTCHD1	SLC7A3	OVOL2	DIDO1	C20orf11	CDS2	ULK1	SERPINF2	TARBP2	CA14	LAMB3	OBSCN
	CD69	PBX4	ZNF682	PLK1	SBK1	MAP1S	TMEM59L	FXYD1	RALY	PHKA2	USP9X	CSNK2A1	CSE1L	LAMA5	MAPRE1	PTGES3	PLD2	DUSP6	ESRRG	C1orf97	ESRRG
	TCTN2	ZNF682	CBLC	SBK1	PARD6A	HMHA1	GMIP	CAPN12	PLCG1	PRKX	VCX3A	CDS2	MAPRE1	BCAS4	CD93	APAF1	CD79B	PIP4K2C	BAI2	ELF3	MLLT11
	CRY1	CBLC	YJEFN3	PLCG2	PKD1	YJEFN3	PBX4	PBX4	SLCO4A1	ARSE	TSC22D3	CD93	RALY	DIDO1	RALY	TARBP2	GJC1	GUCY2C	MLLT11	HHAT	IL19
	PLBD1	YJEFN3	ABHD9	ST3GAL2	CACNA1H	ATP8B3	ZNF682	ZNF682	NAPB	KAL1	TCEAL2	RSPO4	PLCG1	CSE1L	PLCG1	DUSP6	ETV4	BCAT1	EYA3	PCTK3	PYCR2
	FLJ20674	CD70	AP1M2	PARD6A	CORO1A	SPC24	MAP1S	CBLC	RNF114	VCX3A	HPRT1	CST1	SLCO4A1	ADNP	SLCO4A1	PIP4K2C	TOM1L1	PKP2	EXTL1	BATF3	ZNF672
	PTPRR	ABHD9	HPN	HP	HEATR3	SMARCA4	YJEFN3	YJEFN3	PLAGL2	GPM6B	PNMA3	JAG1	SS18L1	DDX27	RNF114	GLS2	ZNHIT3	GCN1L1	ZNF672	LRRN2	RGS7
	C12orf48	C19orf47	SH2D3A	DPEP1	SETD1A	CD70	CD70	CD70	ZSWIM1	REPS2	ALG13	C20orf72	RNF114	PLCG1	PLAGL2	C12orf47	GAS7	CRY1	FAAH	BTG2	PVRL4
	SPRYD4	AP1M2	TRIP10	CACNA1H	IFT140	ABHD9	ABHD9	ABHD9	ZSWIM3	CXorf15	ZNF182	FERMT1	PREX1	SLCO4A1	ZSWIM1	UNG	RPL23	TIMELESS	RGS7	KISS1	RGS16
	SLC39A5	HPN	ZNF493	CDT1	C16orf5	AP1M2	AP1M2	C19orf47	PCNA	SCML2	GYG2	C20orf46	PLAGL2	BIRC7	ZSWIM3	GCN1L1	ITGA2B	CLSTN3	RGS16	SLC30A1	CNIH4
	FAR2	SH2D3A	PRMT1	SETD1A	SULT1A1	MIDN	MIDN	AP1M2	RAE1	TMEM27	MAGT1	FASTKD5	ZSWIM1	MYT1	PCMTD2	YEATS4	UBE2O	PLBD1	C1orf51	NEK2	C1orf51
	POLR3B	TRIP10	CHAF1A	FANCA	CDH1	SH2D3A	SH2D3A	HPN	CD40	GYG2	IL1RAPL1	SLC4A11	CHD6	SS18L1	C20orf177	CRY1	ITGB4	KNTC1	TNRC4	IL19	TNRC4
	SYT1	ZNF493	HRC	CDH1	FBXL16	UQCR	UQCR	SH2D3A	EYA2	OFD1	FAM123B	CDK5RAP1	ID1	RNF114	PCNA	TIMELESS	ACAP1	FLJ20674	RIMS3	JARID1B	IRF6
	PRICKLE1	PRMT1	GLTSCR2	DOK4	PLLP	ATCAY	ZNF493	UQCR	B4GALT5	PCYT1B	FRMPD4	HSPA12B	RIMS4	PREX1	RAE1	KRT18	SLC9A3R1	C12orf48	TMEM48	C1orf106	MEF2D
	C12orf66	CHAF1A	RAVER1	FBXL16	CPNE2	CYP4F22	CHAF1A	ZNF493	NEURL2	MID1	PHF16	PCNA	ZSWIM3	ZSWIM1	EYA2	KRT81	KIAA0195	SLC39A5	TMEM56	TATDN3	PTGS2
	DPPA3	HRC	ZNF813	WFIKKN1	KCTD13	CHAF1A	ODF3L2	PRMT1	FAM83D	PDK3	FANCB	MRPS26	AURKA	RIMS4	B4GALT5	FLJ20674	RAB37	FAR2	SLC6A17	ATF3	C1orf66
	KCNA5	RAVER1	ZNF331	C16orf75	MAPK8IP3	PPAP2C	ZNF562	CHAF1A	C20orf195	PIR	FAM122B	FLRT3	PCMTD2	ZSWIM3	FAM83D	KNTC1	UNC13D	MORN3	C1orf162	SLC45A3	POGZ
	TWF1	ZNF813	ZNF613	PLLP	ZNF646	ZNF561	FLJ22184	HRC	RASSF2	EGFL6	ACTRT1	SNX5	DPM1	AURKA	C20orf195	NUP37	RDM1	SYT1	HHAT	PLEKHA6	LEFTY2
	DIABLO	ZNF331	SLC39A3	GPR114	AMDHD2	ODF3L2	CILP2	KIRREL2	ProSAPiP1	GPR64	GRPR	RP4-691N24.1	C20orf177	PCMTD2	RASSF2	C12orf48	MRPS7	CHFR	C1orf106	KIF14	HHAT
	MANSC1	ZNF613	DMKN	MYH11	RNPS1	OLFM2	STXBP2	ODF3L2	FAM110A	GPR143	SYP	MKKS	RAE1	DPM1	ProSAPiP1	SLC39A5	JUP	PRICKLE1	TATDN3	SYT14	RGL1
	RAB3IP	SLC39A3	LONP1	KCTD13	TRAP1	SIN3B	ANKLE1	GLTSCR2	ZMYND8	MAP7D2	SYN1	NOP56	EYA2	C20orf177	FAM110A	MORN3	YBX2	DPPA3	NOC2L	IL24	C1orf106
	SLC2A14	DMKN	C19orf62	MAPK8IP3	TOX3	ZNF562	CDC34	ZNF813	ZNF334	FRMPD4	CXorf39	SDCBP2	B4GALT5	RAE1	ZMYND8	CHFR	JMJD3	KCNA5	TADA1L	REN	PSMD4
	A2ML1	KPTN	CILP2	AMDHD2	RAB26	FLJ22184	LPAR2	ZNF331	C20orf103	APOO	LAGE3	MCM8	YTHDF1	COL9A3	ZNF334	PRICKLE1	NEK8	DIABLO	HOOK1	LAD1	TATDN3
	FGD6	STXBP2	STXBP2	RNPS1	Magmas	ZNF442	SHD	ZNF613	INSM1	FANCB	PNCK	SLC24A3	TGIF2	EYA2	C20orf103	FBXL10	MYL4	RAB3IP	ID3	C1orf74	PPPDE1
	KITLG	MLL4	CDC34	TRAP1	XYLT1	CILP2	ZNF627	DMKN	PMEPA1	KLHL34	KAL1	RASSF2	CDH26	B4GALT5	INSM1	SLC11A2	FLJ40504	SLC2A14	GPR3	LEMD1	SEMA6C
	NAV3	CDC34	GRIK5	RAB26	KIAA0182	KRI1	XAB2	GRWD1	NKAIN4	CTPS2	WNK3	STK35	DSN1	C20orf201	PMEPA1	SMARCD1	C17orf63	AMDHD1	SMPDL3B	DDX59	SHC1
	CCT2	SFRS16	MAP4K1	TNRC6A	C16orf79	STXBP2	ZNF254	CILP2	RPS21	SAT1	CXorf15	C20orf7	FAM83D	WFDC2	NKAIN4	ZBTB39	GARNL4	FGD6	LIN28	G0S2	TADA1L
	IRAK3	GRIK5	IRF3	Magmas	ORC6L	GCDH	HAPLN4	STXBP2	CBFA2T2	ACE2	ZCCHC12	CHGB	DNMT3B	YTHDF1	RPS21	DIABLO	MYH10	ESPL1	PFKFB2	GOLT1A	PRUNE
	NAP1L1	MAP4K1	FUT2	PGP	ABCC12	ANKLE1	NRTN	ANKLE1	DHX35	GRPR	SEPT6	ProSAPiP1	C20orf195	CDH26	CBFA2T2	RAB3IP	RAB11FIP4	MGP	ATF3	CRB1	SDHC
	YAF2	IRF3	FUT1	C16orf79	JPH3	CDC34	GDF15	CDC34	RBM38	VCX3B	NAP1L3	TRMT6	C20orf160	MMP9	C20orf54	AMDHD1	POLG2	TMTC1	C1orf187	IL10	PFKFB2
	RERG	FUT6	NLRP12	TFAP4	FUK	FSD1	ABCA7	SULT2B1	LBP	NLGN4X	MID1	FAM110A	HRH3	SEMG1	DHX35	FGD6	CDRT4	KRT80	KIF2C	TNNT2	DISP1
	EID3	FUT1	THOP1	JPH3	TERF2	SHD	MEF2B	GRIK5	SMOX	SHROOM2	DDX26B	C20orf96	ZMYND8	SALL4	RBM38	ESPL1	MAP2K4	ZNF10	SLC27A3	PIK3C2B	ATF3
	LGR5	NLRP12	ZNF649	INO80E	DHODH	ZNF627	CRB3	MAP4K1	SNAP25		ZIC3	BFSP1	DOK5	EEF1A2	LBP	PPP1R1A	NOTUM	RERG	IL24	CNTN2	PARP1
	PLEKHA9	THOP1	CRB3	NUBP2	PHKB	TCF3	CCDC151	IRF3	LAMA5		PIR	ZCCHC3	ZNF334	C20orf195	SMOX	PPP1CC	TBC1D3B	MAPKAPK5	IGSF3	NUAK2	KLHDC9
	RNFT2	ZNF649	ASF1B	LDHD	CX3CL1	NR2F6	ZNF177	FUT2	ADNP		GPR64	C20orf103	CTNNBL1	GATA5	SNAP25	C12orf45	GLOD4	LGR5	C1orf115	IRF6	SLC27A3
	LETMD1	CRB3	CLDND2	DHODH	AFG3L1	PRG2	NOTCH3	FUT1	PDRG1		RBMX	TCF15	UCKL1	SOX18	LAMA5	TMTC2	DNAH2	DENR	SRM		IL24
	TMEM132D	ASF1B	CTXN1	CX3CL1	SRRM2	LOC90379	TUBB4	NLRP12	MYT1		CASK	CSRP2BP	KCNQ2	ZGPAT	ADNP	LOC338799	ZNF286A	C12orf34	SFN		C1orf115
	PTPRB	CLDND2	BRSK1	AFG3L1	SULT1A4	EPOR	CTXN1	MEF2B	CDK5RAP1		HS6ST2	INSM1	ADRM1	HRH3	PDRG1	KRT80	WSB1	PTPN6	C1orf64		MIXL1
	METTL7A	CTXN1	DHX34	SRRM2	LOC613037	XAB2	TLE2	THOP1	HSPA12B		XK	CPXM1	KCNG1	TNNC2	MYT1	HSPB8	ANKFY1	RNFT2	SPRR2D		KCNK1
	CPM	BRSK1	SNX26	SULT1A4	ZNF768	HAPLN4	KANK3	ZNF649	MRPS26		VGLL1	LRRN4	KIAA0406	ZMYND8	CDK5RAP1	ZNF10	CLDN7	TMEM132D	SPRR2A		SPRR2D
	UTP20	SNX26	TLE2	LOC613037	CBLN1	NRTN	HNRNPM	CRB3	TPX2		PCSK1N	FOXA2	PMEPA1	DOK5	HSPA12B	MAPKAPK5	RASL10B	P2RX2	ATXN7L2		SPRR2A
	KCNMB4	TLE2	KANK3	CBLN1	WDR59	GDF15	FBN3	CTXN1	SNX5		TNMD	SNRPB	NKAIN4	ZNF334	MRPS26	PRIM1	TMEM97	TEAD4	ABL2		NUAK2
	CLEC2D	KANK3	ALDH16A1	SULT1A2	PALB2	ABCA7	PTBP1	BRSK1	RBM12		ASB9	BMP2	UBE2C	ZBTB46	TPX2	GLIPR1L1	ARRB2	ZNF641	FLAD1		C1orf61
	GPR19	ALDH16A1	HNRNPM	CMTM4	TMEM8	MEF2B	FCHO1	SNX26	RP4-691N24.1		BHLHB9	C20orf54	C20orf107	UCKL1	SNX5	ARHGAP9	SSTR2	METTL7A	IL28RA		ABL2
	SLC25A3	HNRNPM	FBN3	ELMO3	ZFHX3	CRB3	TJP3	ZNF701	SEMG1		LPAR4		BMP7	KCNQ2	RBM12	ARID2	PCTP	KCNMB4	WNT4		TPR
	C12orf26	FBN3	PTBP1	DNASE1	FBXO31	CCDC151	DOCK6	TLE2	NOP56		PHKA2		RPS21	ADRM1	RP4-691N24.1	LGR5	MMD	DUSP16	ACTA1		FLAD1
	ASCL1	PTBP1	LRG1	IL32	CMTM4	ANKRD24	RNASEH2A	KANK3	SDCBP2		PHKA1		CBFA2T2	KCNG1	SEMG1	DENR	VTN	RND1	CITED4		LRRN2
	VWF	LRG1	SEPW1	CCNF	ELMO3	ZNF177	MAST1	HNRNPM	GATA5		ARSE		DHX35	PMEPA1	NOP56	MSI1	ASGR2	ART4	C1orf53		BTG2
	ACTR6	RNASEH2A	RNASEH2A	GPR56	IL32	ZNF443	ZNF560	FBN3	CHGB		GPM6B		RBM38	NKAIN4	SDCBP2	C12orf34	ASGR1	VWF	ATP1A1		KISS1
	ATP6V0A2	MAST1	MAST1	RLTPR	PRSS27	DDX39	EBI3	PTBP1	ZGPAT		ZMYM3		LBP	UBE2C	GATA5	RFC5	ZNF750	FKBP4	HES4		RBM34
	HSD17B6	EBI3	EBI3	NUP93	DNASE1L2	NOTCH3	PDE4C	FCHO1	CSRP2BP		PNMA6A		ACTR5	C20orf107	CHGB	RNFT2	AURKB	VPS33A	GNG4		ACTA1
	ATF1	LSM4	LSM4	CENPN	GPR56	TUBB4	AKAP8L	C19orf41	DNTTIP1		TMEM27		C20orf11	BMP7	TRMT6	ARF3	GRB7	CCND2	MUC1		NMNAT2
	FKBP4	KHSRP	KHSRP	SLC7A5	NPIP	PCSK4	CHERP	RNASEH2A	EMILIN3		FGF13		LAMA5	RPS21	ZGPAT	TMEM132D	FGF11	CAND1	DPM3		MARK1
	MDM2	DAZAP1	DAZAP1	PRSS8	LOC606724	CTXN1	LSM4	MAST1	SNRPB		GPC4		BCAS4		CSRP2BP	P2RX2	WNT3	DDX51	DDX59		C1orf53
	GATC	SPTBN4	SPTBN4	SYT17	GOT2	S1PR5	HNRPA1L-2	EBI3	MMP24		TMSB15A		ADNP		EMILIN3	SNRPF	PPP1R1B	KRT7	ACTN2		PLEKHA6
	RAB35	MGC24975	MGC24975	MAZ	NUP93	ILF3	SEMA6B	CHERP	XRN2		NCRNA00086		DDX27		SNRPB	ZNF641	MRPL10	KRT8	ZP4		GNG4
	FLJ40142	ISYNA1	ISYNA1	KLHDC4	SLC7A5	TRMT1	KISS1R	LSM4	DIDO1		PIM2		BIRC7		C20orf24	METTL7A	TRAF4	ACACB	GRHL3		MUC1
	KRAS	ANO8	DPY19L3	CHST6	ZKSCAN2	STAP2	KHSRP	HNRPA1L-2	OVOL2		DLG3		PDRG1		MMP24	KCNMB4	LOC90586	ERP27	KCNT2		DPM3
	STK38L	C19orf46	ANO8	PRDM7	PRSS8	TLE2	RFX1	SEMA6B	RSPO4		BEX4		MYT1		XRN2	ALDH2	KCNJ16	NR2C1	ARHGEF16		S100A14
	ERP27	TTYH1	C19orf46	KREMEN2	SYT17	TIMM44	DAZAP1	KHSRP	JAG1		SPIN4		COL9A3		DIDO1	SLC6A15	PSMC3IP	PRPH	ITLN2		DAP3
	NR2C1	FCAR	TTYH1	PDXDC1	MT3	KANK3	UBA52	PRKD2	CHD6		FUNDC1		C20orf201		OVOL2	RND1	RPRML	LMO3	MARCKSL1		DDX59
	HSP90B1	TMEM149	FCAR	MRPS34	ABCA3	HNRNPM	ISYNA1	DAZAP1	ID1		DIAPH2		WFDC2		RSPO4	MUCL1	ADAP2	NCOR2	PIK3C2B		ACTN2
	GSG1	ZNF260	TMEM149	C16orf74	CNOT1	FBN3	SGTA	ISYNA1	C20orf46		DKC1		TPX2		JAG1	SOCS2	RND2	PUS1	FBXO2		ZP4
	TMEM116	HMHA1	ZNF260	MVD	GNPTG	PTBP1	ZNF93	SGTA	FASTKD5		WWC3		RBM12		SS18L1	SLC4A8	DLX3	ALX1	PGBD5		KCNT2
	MCRS1	DHDH	HMHA1	QPRT	HYDIN	FCHO1	PPAN-P2RY11	NOSIP	RIMS4		PRPS2		MMP9		PREX1	ADAMTS20	TBC1D3G	COL2A1	C1orf2		ITLN2
	TMEM120B	PPP1R13L	DHDH	ZNF423	KLHDC4	MATK	HMHA1	C19orf46	AURKA		ABCB7		SEMG1		CHD6	ANKS1B	FLJ25006	CNTN1	FAM5C		TNNT2
	CPNE8	CRLF1	AURKC	GPRC5B	CHST6	ACP5	ATP8B3	TTYH1	FLRT3		BEX1		SALL4		ID1	C12orf68	PRPSAP2	METTL7B	TFAP2E		PIK3C2B
	KRR1	CGB1	PPP1R13L	CES3	KREMEN2	TJP3	SPC24	TMEM149	YTHDF1		RP6-213H19.1		EEF1A2		C20orf46	RHOF	GSG2	ACVR1B	C1orf54		PGBD5
	HMGA2	MYH14	CRLF1	ERAF	USP7	DOCK6	SMARCA4	HMHA1	TGIF2		PTCHD1		GATA5		FASTKD5	PAN2	GSDMB	TROAP	KIAA1751		C1orf2
	ALX1	NACC1	CGB1	PAQR4	ZNF276	POLRMT	ATCAY	DHDH	DSN1		PRKX		PPP1R16B		RIMS4	TMEM194A	KPNA2	ATP2B1	PCTK3		FAM5C
	C12orf28	RINL	NACC1	UBE2I	C16orf84	RNASEH2A	ZNF681	LILRB1	MKKS		PRPS1		SOX18		AURKA	CUX2	SLC43A2	USP44	CREB3L4		ETNK2
	UHRF1BP1L	CADM4	RINL	SNRNP25	ZNF423	KIAA1543	CYP4F22	AURKC	DNMT3B		REPS2		ZGPAT		DPM1	VPS33A	SP6	GPR162	TTF2		C1orf57
	CNTN1	DNM2	CADM4	NKD1	MRCL3	MAST1	PPAP2C	CYP4F22	C20orf160		MCF2		TNNC2		FLRT3	C12orf41	GPRC5C	WBP11	JARID1B		TMEM79
	TSPAN31	KRI1	DNM2	SYNGR3	GPRC5B	ZNF560	ZNF561	PPAP2C	STK35		MAOA		ZBTB46		YTHDF1	BRI3BP	ATP1B2	AEBP2	NES		BNIPL
	GLT8D2	ZNF700	C19orf51	DBNDD1	CNGB1	EBI3	OLFM2	CRLF1	C20orf7		COL4A6		EMILIN3		TGIF2	SLC38A1	SLC13A5	SLC17A8	TMEM52		C1orf54
	TMPO	LILRB3	KRI1	RHOT2	SPIRE2	PDE4C	CRLF1	MYH14	HRH3		COL4A5		C20orf24		CDH26	DNAJC22	TTYH2	ASCL4	SLC45A3		PCTK3
	METTL7B	SF3A2	SF3A2	KIAA0895L	PAQR4	AKAP8L	SIN3B	CADM4	AHCY		UTX				DSN1	TBX3	TMEM93	SCNN1A	DBT		CREB3L4
	ACVRL1	CCNE1	CCNE1	SALL1	CNTNAP4	GNG7	ZNF430	ZNF430	DOK5		ZBTB33				MKKS	ERBB3	TMEM92	BTBD11	YRDC		JARID1B
	ACVR1B	DMWD	STRN4	C16orf59	LOC390748	REEP6	ZNF442	C19orf51	CTNNBL1		UTP14A				DNMT3B	HNRNPA1	NLK	HRK	S100A9		NES
	USP44	STRN4	UPK1A	CALB2	CCDC78	LPHN1	KRI1	SYMPK	BFSP1		TSPAN7				C20orf160	CAND1	TSEN54	ULK1	C1orf74		B4GALT3
	SCNN1A	UPK1A	HICE1	CENPT	ITFG3	CHERP	GCDH	KRI1	UCKL1		TSPAN6				STK35	RPL6	C17orf28	PTGES3	GADD45A		SLC45A3
	BTBD11	HICE1	PPAN	HBQ1	NKD1	LSM4	FSD1	LILRB3	TCF15		IQSEC2				C20orf7	DDX51	CYGB	APAF1	LOR		CABC1
	COQ5	PPAN	ZNF431	ROGDI	SYNGR3	GTPBP3	TCF3	CCNE1	KCNQ2		MID1IP1				HRH3	TESC	PPM1E	PLEKHG6	ZC3H12A		EXO1
	HRK	ZNF431	PRRG2	USP10	METRN	HNRPA1L-2	NR2F6	UPK1A	ADRM1		CCDC120				AHCY	IL23A	TOP2A	GLS2	GOLT1A		TOMM20
	CRADD	PRRG2	NR2C2AP	HAS3	DBNDD1	CNN1	PRG2	ZNF431	CPXM1		SAT1				DOK5	KRT7	CROP	C12orf47	RSC1A1		LAD1
	EEA1	NR2C2AP	C19orf33	HBA2	RHOT2	CLEC4G	LOC90379	PRRG2	KCNG1		UPF3B				CTNNBL1	KRT8	SCN4A	RIMKLB	VTCN1		S100A9
	PTGES3	C19orf33	NCCRP1	C16orf57	KIAA0895L	PALM	EPOR	FLJ40125	KIAA0406		BEX5				BFSP1	ACACB	RHBDL3	CLEC1A	RPS27		C1orf74
	UBE2N	NCCRP1	SLC7A10	DCTPP1	SALL1	SEMA6B	ZNF431	ANKRD24	PANK2		STAG2				UCKL1	NFE2	UBE2G1	CLEC1B	TARS2		LOR
	UBC	JMJD2B	PCSK4	NTHL1	C16orf59	KISS1R	ANKRD24	C19orf33	FOXA2		NXT2				TCF15	NR2C1	TMEM100	CMAS	LCE1B		LEMD1
	C1R	SLC7A10	ZNF628	MT1G	RNF40	KHSRP	ZNF443	NCCRP1	UBE2C		OFD1				KCNQ2	DIP2B	GRAP	UNG	BATF3		NUF2
	PCTK2	PCSK4	TIMM44	MT1H	CALB2	ITGB1BP3	DDX39	SLC7A10	BMP2		SHROOM4				ADRM1	PRPH	C1QBP	YEATS4	TACSTD2		H3F3A
	GLS2	S1PR5	MATK	MT1F	GNAO1	RFX1	PCSK4	PCSK4	BMP7		SLITRK4				CPXM1	INHBE	C17orf53	KRT18	PAP2D		GOLT1A
	C12orf47	ZNF628	PLEKHG2	PRMT7	CENPT	RGL3	S1PR5	S1PR5	ACTR5		ERCC6L				KCNG1	NELL2	PIPOX	KRT81	NPPB		CRB1
	IKIP	TIMM44	TOMM40	ACD	HBQ1	DAZAP1	ZNF91	ZNF480	C20orf11		GPR143				KIAA0406	WIBG	GEMIN4	NUP37	COL24A1		RPS27
	RIMKLB	MATK	GNG7	ZNF174	ROGDI	ISYNA1	ILF3	TIMM44	BCAS4		L1CAM				FOXA2	KIF21A	SLC47A1	GDF3	ACP6		CLK2
	OLR1	PLEKHG2	REEP6	TELO2	HAS3	SGTA	TRMT1	MATK	CSNK2A1		KIF4A				UBE2C	NCOR2	SMYD4	DDX11	REN		TARS2
	CLEC1A	TOMM40	LPHN1	CLDN6	DEF8	AMH	STAP2	ACP5	DDX27		GDPD2				C20orf107	PUS1	KRT19	FBXL10	RBM15		SETDB1
	CLEC1B	GNG7	WDR18	TUBB3	MT1G	ZNF101	TIMM44	TOMM40	CST1		GLA				BMP2	ALX1	MIS12	SLC11A2	DEM1		LAMC2
	CMAS	REEP6	CNFN	RNF166	MT1H	FKSG24	MATK	GNG7	BIRC7		GPC3				BMP7	COL2A1	LRRC45	SMARCD1	MRPS21		LAMB3
	RNF34	LPHN1	C19orf6	GINS2	MT1F		ACP5	REEP6	C20orf72		NUP62CL				SEC23B	CNTN1	RHBDF2	ZBTB39	MOSC1		SMG7
	KRT18	SIPA1L3	MED16	PKMYT1	PRMT7		POLRMT	LPHN1	FERMT1		ACE2				ACTR5	DDX55	CA4	LDHB	RGS1		LCE1B
	LARP4	CNN1	ITGB1BP3	ZNF205	ACD		KIAA1543	CNN1	SLC4A11		VCX3B				C20orf11	METTL7B	CYB5D1	PPP1R1A	RGS2		BATF3
	PPFIBP1	CNFN	TNNI3	BOLA2	CHD9		GNG7	CNFN	COL9A3		TIMM8A				BCAS4	POLE	SLC16A6	PPP1CC	KLHL12		LGALS8
	ABCB9	C19orf6	TNNT1	MARVELD3	TPPP3		REEP6	CLEC4G	DTD1		FAAH2				CSNK2A1	ACVR1B	TMEM88	C12orf45	VANGL2		SLC30A1
	NUP37	ITGB1BP3	C19orf29	SOX8	TUBB3		LPHN1	ITGB1BP3	C20orf201		AIFM1				DDX27	TROAP	SUMO2	TMTC2	GABPB2		SIPA1L2
	GDF3	TNNI3	SCAF1	HN1L	ZNF629		GTPBP3	TNNI3	WFDC2		SMS				CST1	ATP2B1	RNF43	LOC338799	TXNIP		ACP6
	DDIT3	TNNT1	REXO1	SPN	NDRG4		CNN1	TNNT1	MMP9		BCOR				BIRC7	EP400	DHX33	C12orf35	IVNS1ABP		REN
	LYRM5	C19orf29	ZNF101	SPG7	NPIPL1		CLEC4G	ATF5	SALL4		SCML2				C20orf72	USP44	ACSF2	HSPB8	CCT3		IGSF9
	SIRT4	SCAF1	LMTK3	SLC6A10P	RSPRY1		PALM	ZNF101	EEF1A2		BRWD3				FERMT1	NUP107	NLE1	PRIM1	RPS6KA1		METTL13
	GIT2	ZNF101	TNFSF9	ARHGDIG	GINS2		ITGB1BP3	LMTK3	MCM8		FAM133A				SLC4A11	SLC17A8	SH3D20	GLIPR1L1	PDPN		CGN
	FAM19A2	LMTK3	LASS4	PRKCB	CACNG3		RGL3	TNFSF14	SLC24A3		NLGN3				COL9A3	ZNF385A	CENPV	ARHGAP9	LEFTY1		MRPS21
	FBXL10	APLP1	LASS1	KATNB1	ZNF205		AMH	LASS4	PPP1R16B		PDK3				C20orf201	ASCL4	NOS2	ARID2	ADAMTSL4		MOSC1
	SLC11A2	LASS4	APOC1	GINS3	SOX8		ZNF101	LASS1	SOX18		TCEAL8				WFDC2	AMHR2	ZNF232	MSI1	RAP1GAP		RAG1AP1
	CYP27B1	LTBP4	PNMAL1	C16orf88	SPN		FKSG24	APOC1	TNNC2		NUDT11				MMP9	BTBD11	RASD1	RFC5	HIST2H2AA3		RGS1
	ZBTB39	LASS1	APOE	SOLH	ZFPM1			PNMAL1	C20orf96		MAP7D2				SALL4	CDK2	LIG3	ARF3	TNFRSF4		RGS2
	MED13L	APOC1	TRAPPC6A	TRAF7	SPG7			APOE	ZBTB46		ARHGAP4				EEF1A2		LHX1	SNRPF	MRPL55		CKS1B
	NDUFA4L2	PNMAL1	MAP1S	NRN1L	SLC6A10P			TRAPPC6A	ZCCHC3		SOX3				MCM8		ABI3	ALDH2	TUFT1		KLHL12
	ETNK1	APOE	KLC3	ABCC6	WDR24			GMIP	LRRN4		CTPS2				SLC24A3		C17orf61	SLC6A15	CTSE		BCL9
	PPP1CC	GMIP	USF2	HAGHL	ARHGDIG			MAP1S			PCDH19				PPP1R16B		PCGF2	MUCL1	MRPL24		VANGL2
	PARP11	MAP1S	TEAD2	MMP25	PRKCB			KLC3			AR				SOX18		YPEL2	SOCS2	RPL5		GABPB2
	LTBR	KLC3	MIDN	MYLK3	MTHFSD			TEAD2			NLGN4X				TNNC2		SOX15	SLC4A8	RP5-1077B9.4		TXNIP
	LUM	TEAD2	BCL2L12	IL34	KATNB1			MIDN			SHROOM2				C20orf96		SOX9	ADAMTS20	C1orf102		IVNS1ABP
	GLTP	MIDN	RHPN2	ZNF48	SOLH			BCL2L12			ATP11C				ZBTB46		MSI2	ANKS1B	IL10		CCT3
	PRB1	BCL2L12	LENG8	AXIN1	HAGHL			RHPN2			TRO				ZCCHC3		CHRNB1	RAD51AP1	ENSA		HEATR1
	PRB3	CPAMD8	CACNG6	TBL3	KCTD5			CACNG6			PDZD4				LRRN4		RPAIN	C12orf68	CNTN2		UBQLN4
	PRIM1	RHPN2	PAK4	CRAMP1L	APRT			CACNG7			FGF16						INTS2	RHOF	C1orf172		DARS2
	ARID2	CLPTM1	GATAD2A	CTCF	MMP25			PAK4			ZNF81						PFAS	PAN2	L1TD1		LEFTY1
	PRKAG1	LENG8	CYP2S1	RFWD3	IL34			ZNF562			PCYT1B						TUBD1	GABARAPL1	ZNF692		ADAMTSL4
	ARHGDIB	CACNG6	FLJ22184	CORO7	AXIN1			CYP2S1			HMGB3						SPAG5	TMEM194A	ACOT7		CREG1
	PRR13	PAK4	TM6SF2	PLA2G10	ALDOA			FLJ22184			GSPT2						AXIN2	LPCAT3	CTH		HIST2H2AA3
	NDUFA12	DYRK1B	CGB5	GCSH	TBL3			LPAR2			GRIPAP1						RAPGEFL1	GPRC5A	AHCTF1		SYT14
	MAGOHB	GATAD2A	LPAR2	GDPD3	TSC2			RYR1			IGSF1						ALDH3A2	CUX2	C1orf97		KIF14
	SLC6A15	CYP2S1	RYR1	FA2H	CRAMP1L			SHD			WDR40B						KSR1	C12orf41	APOA1BP		MRPL55
	FAM90A1	FLJ22184	SHD	NME4	ZNF500			ZNF627			RPL36A						WRAP53	BRI3BP	FBXO44		TUFT1
	SOCS2	CGB5	KCTD15	CHST4	CORO7			FBXO46			BTK						SLFN13	SLC38A1	ISG20L2		CTSE
	MDM1	LPAR2	FBXO46	RHBDL1	FLJ22167			CA11			APOO						SMTNL2	DNAJC22	C1orf43		MRPL24
	LIN7A	RYR1	CA11	ZNF764	PLA2G10			EID2B			KLHL4						PGS1	TBX3	TMEM125		PAQR6
	ANKS1B	SHD	EID2B	ATF7IP2	TUFM			EPS8L1			AMMECR1						PELP1	ERBB3	NEK2		IL10
	RAP1B	KCTD15	EPS8L1	TAF1C	GCSH			XAB2			ZDHHC15						GALR2	HNRNPA1	TIPRL		ENSA
	RAN	FBXO46	XAB2	ATXN2L	NME3			ZNF254			KLHL13						TTC19	NANOG	ALPL		C1orf35
	CAMKK2	CACNA1A	ZNF254	RPL13	GAS8			HAPLN4			CSTF2						GCGR	RPL6	RAB13		CNTN2
	ALG10B	CA11	HAPLN4	IL4R	RHBDL1			NRTN			ZNF75D						MMP28	TESC	RAB25		ZNF692
	NFYB	EID2B	NRTN	TMC7	CMTM1			ZNF614			NRK						WSCD1	IL23A	ZNF695		AHCTF1
	BRI3BP	EPS8L1	DUS3L	NFATC3	ZNF764			GDF15			RPGR						RICH2	NFE2	TNFRSF8		C1orf97
	RPL41	XAB2	ZNF614	MGRN1	ATF7IP2			ABCA7			LAS1L						DHRS11	KIAA1467	CD247		ELF3
	SLC38A1	ZNF254	GDF15	CES1	SNAI3			EXOSC5			ZNF280C						NME1	DIP2B	OBSCN		APOA1BP
	RPLP0	HAPLN4	ABCA7	THOC6	TXNL4B			CCDC151			FOXO4						LLGL1	INHBE	IL19		ISG20L2
	STX2	NRTN	ZNF347	MMP15	TAF1C			ZNF177			EGFL6						LLGL2	NELL2	HPDL		C1orf43
	RNF41	DUS3L	EXOSC5	CDH5	ATXN2L			ZNF792			NGFRAP1						FAM117A	WIBG	PYCR2		NEK2
	HNRNPA1	ZNF614	CCDC151	CDH3	TMC7			NOTCH3			MAGEE1						SHPK	KIF21A	MMP23B		RPRD2
	C12orf30	GDF15	ZNF823	C16orf14	CSNK2A2			TUBB4			POLA1						TLCD1	DDX55	MMP23A		TIPRL
	XPOT	ABCA7	SPPL2B	GPT2	NFATC3			NPAS1			BEX2						BLMH	PHC1	HES2		CRTC2
	RPL6	ZNF347	ZNF792	NUDT16L1	MGRN1			BCAM			LRCH2						HNF1B	POLE	RBP7		TFB2M
	TESC	EXOSC5	LSM7	WDR90	RANBP10			LIG1			CDX4						RPA1	CCDC77	PVRL4		SEMA4A
	IL23A	ZNF823	CREB3L3	FAM100A	CES1			TJP3			CXorf57						HAP1	EP400	CNIH4		POU2F1
	NFE2	SPPL2B	NOTCH3	VAC14	MSLN			DOCK6			KLHL34						ERBB2	SLC2A3	CDC20		PLD5
	GDF11	ZNF792	TUBB4	PPL	MMP15			SPIB			TMSB15B						RPL23A	LPAR5	FUCA1		G0S2
	INHBE	LSM7	CRTC1	LUC7L	CDH5			ZNF560			SLC6A8						TBX2	NUP107	IRF6		EFNA1
	PPHLN1	NOTCH3	CNOT3		CDH3			PDE4C			XKRX						ENO3	ZNF385A	MEF2D		PPOX
	C12orf60	TUBB4	BCAM		GBL			AKAP8L									KIAA0664	AMHR2	PTGFRN		RAB13
	UNC119B	CRTC1	LIG1		SH2B1			NLRP7									TMC6	CDK2	PTGS2		RAB25
	TMTC3	LGALS7	CCDC124		GPT2			HIF3A									CCDC45		C1orf66		ZNF695
	HVCN1	CNOT3	TJP3		PDPR			KISS1R									MPP2		POGZ
	LPAR5	BCAM	DOCK6		SEZ6L2			RFX1									RAMP2		ZNHIT6
	FAM113B	LHB	SPIB		EARS2			PRKCG									CBX2		BEST4
	CDKN1B	LIG1	AKAP8L		NECAB2			UBA52									EPN3		LEFTY2
	AMHR2	CCDC124	NLRP7		WDR90			CHST8									GPR172B		FNDC5
	DHX37	TJP3	KISS1R		ANKS3			SNRPA									KCNH6		RGL1
		DOCK6	RFX1		FAM100A			ZNF574									SDK2		PSMD4
		SPIB	TMC4		LUC7L			ZNF93									NOL11		MANEAL
		AKAP8L	CHST8		MRCL2			SYT3									EFNB3		TINAGL1
		NLRP7	ALKBH7		NETO2			PPAN-P2RY11									RAC3		CPT2
		KISS1R	SNRPA					ZNF761									MED9		PPPDE1
		RFX1	ZNF574					ATP8B3									DHRS13		FCN3
		TMC4	ZNF93					SPC24									PRAC		SEMA6C
		SNRPA	SNRNP70					SMARCA4									SLC6A4		SHC1
		ZNF574	KRTDAP					SPINT2											ZNF593
		ZNF93	PPP1R14A					ZNF296											PTPRF
		SNRNP70	PPAN-P2RY11					WDR62											PRUNE
		KRTDAP	PLEKHJ1					ATCAY											COL11A1
		PPP1R14A	ZNF761					NAPSA											SYTL1
		PPAN-P2RY11	ATP5SL					ZNF681											SDHC
		PLEKHJ1	ATP8B3					FLJ10490											ST6GALNAC3
		ZNF761	SPC24					VSTM1											PRPF38A
		ATP5SL	SPINT2					ZNF561											DISP1
		ATP8B3	ZNF296					FBL											PARP1
		SPC24	GNG8					OLFM2											DHRS3
		SMARCA4	LMNB2					SIN3B											KLHDC9
		SPINT2	ANGPTL4					RASIP1											MIXL1
		ZNF296	WDR62					ZNF616											KCNK1
		LMNB2	ZNF580					ZNF442											NUAK2
		ANGPTL4	ZNF681					SARS2											C1orf61
		WDR62	FBL					DLL3											TPR
		ZNF580	OLFM2					GCDH											CYP4X1
		ZNF681	BSG					FSD1											LRRN2
		FBL	BST2					TCF3											BTG2
		OLFM2	SIN3B					FAM71E1											KISS1
		BSG	PNKP					TMEM160											RBM34
		BST2	ZNF702P					NR2F6											PPIH
		SIN3B	RASIP1					PRG2											NMNAT2
		ZNF702P	ZNF137					LOC90379											MARK1
		RASIP1	SARS2					EPOR											COL9A2
		ZNF137	CCDC97					FOXA3											MAD2L2
		SARS2	DLL3					ADCK4											VWA1
		DLL3	FSD1					FXYD7											VAV3
		FSD1	TCF3					SELV											PLEKHA6
		TCF3	FAM71E1					NFKBIB											KIF1B
		FAM71E1	TMEM160					NLRP2											S100A14
		TMEM160	NR2F6					LSR											DAP3
		NR2F6	PRG2					ZNF443											CSDE1
		PRG2	SAMD1					C19orf48											RNF19B
		SAMD1	LOC90379					DDX39											MCOLN3
		LOC90379	EPOR					PDCD2L											TNNT2
		EPOR	FOXA3					NLRP8											MTF2
		FOXA3	RDH13					ZNF91											ETNK2
		RDH13	RBM42					ILF3											C1orf57
		RBM42	ADAT3					TRMT1											RAVER2
		ADAT3	SELV					STAP2											TMEM79
		SELV	RNF126					POLRMT											RCC2
		CGB	NFKBIB					KIAA1543											KANK4
		ZNF763	NLRP2					ZIK1											C1orf183
		RNF126	LSR					TMEM145											BNIPL
		NFKBIB	ZNF611					GTPBP3											FAM46B
		NLRP2	MED25					PAFAH1B3											TNFRSF25
		LSR	C19orf48					POLD1											CCDC17
		ZNF443	NCAN					C19orf54											ORC1L
		ZNF611	DDX39					PVRL2											B4GALT3
		MED25	PDCD2L					PALM											EIF2C3
		C19orf48	ZNF91					CEBPA											C1orf135
		NCAN	ILF3					RGL3											CABC1
		DDX39	TRMT1					CEBPG											PTBP2
		PDCD2L	STAP2					GRAMD1A											EXO1
		ZNF91	SIRT6					ZNF114											TOMM20
		ILF3	POLRMT					SLC8A2											LAD1
		TRMT1	C19orf60					AMH											LEMD1
		STAP2	KIAA1543					CCDC9											NUF2
		SIRT6	ZIK1					FKSG24											H3F3A
		POLRMT	ZNF414																CRB1
		C19orf60	MIER2																MCOLN2
		KIAA1543	TMEM145																CLK2
		ZIK1	GTPBP3																LRIG2
		ZNF414	POLD1																STMN1
		MIER2	HDGF2																CLCNKA
		TMEM145	PVRL2																CASZ1
		GTPBP3	CEBPA																SETDB1
		PAFAH1B3	RGL3																LAMC2
		POLD1	ZNF114																LAMB3
		ZNF579	SLC8A2																SMG7
		HDGF2	AMH																LPPR4
		PVRL2	CCDC9																FNBP1L
		PALM	FKSG24																LGALS8
		CEBPA																	SLC30A2

## Sheet: Loss
	H1	H1	H1	H1	H1	H1	H1	H1	H1	H1	H1	H1	H1	H9	H9	H9	H9	H9	H9	H9	H9	H9	H9	H9	iB4	iB5
Location	19p13	19q13	17q25	20q	16p	20q13	17q	19q	19p	16p11	19	16	20	19p13	19q13	20q	16p	20q13	19q	19p	16p13	19	16	20	3	3
Genes (N)	77	83	36	49	65	39	85	84	87	25	172	95	73	101	96	56	68	37	97	114	39	212	100	73	207	210
Raw p value	1.45e-15	9.56e-11	1.46e-10	9.52e-10	1.52e-12	9.36e-11	9.33e-09	1.68e-10	5.46e-18	3.14e-09	8.5e-27	1.34e-11	1.92e-12	5.88e-24	5.75e-12	1.31e-10	7.01e-11	8.2e-08	1.26e-11	1.13e-27	1.25e-07	2.35e-36	1.44e-09	2.49e-09	3.8e-09	8.46e-09
Corrected p value	1.11e-12	1.15e-07	4.2e-08	5.66e-07	1.3e-09	3.57e-08	1.19e-05	2.08e-07	4.83e-15	9.35e-07	2.04e-23	2.31e-08	2.08e-09	4.52e-21	6.91e-09	7.81e-08	5.97e-08	3.12e-05	1.56e-08	9.98e-25	5.11e-05	5.65e-33	2.47e-06	2.7e-06	8.47e-06	1.88e-05
Enrichment factor	2.716	2.117	3.364	2.602	2.61	3.226	1.906	2.083	2.772	3.951	2.376	2.072	2.438	3.04	2.089	2.537	2.33	2.611	2.052	3.099	2.497	2.499	1.861	2.08	1.476	1.456
Gene Symbol	SBNO2	APLP1	C1QTNF1	ZNF335	CHTF18	ZNF335	CCDC55	APLP1	SBNO2	ZNF48	SBNO2	PLA2G15	ZNF335	TNFSF9	APOC1	MMP24	CHTF18	ZNF335	APOC1	TNFSF9	CHTF18	SBNO2	CHTF18	ZNF335	ROBO1	CD86
	HOOK2	LTBP4	SPHK1	ELMO2	GTF3C1	RBM38	HSD17B1	LTBP4	HOOK2	TBC1D10B	HOOK2	CHTF18	ELMO2	TNFSF14	APOE	ZNF335	ZSCAN10	TPD52L2	APOE	TNFSF14	ZSCAN10	HOOK2	HSD11B2	PCIF1	ROBO2	TRAK1
	AES	CAPN12	TIMP2	PCIF1	ATP6V0C	ELMO2	IGFBP4	CAPN12	LASS1	TGFB1I1	CAPN12	HSD11B2	PCIF1	SBNO2	CAPN12	NPEPL1	GTF3C1	NPEPL1	CAPN12	SBNO2	ATP6V0C	TLE6	ZSCAN10	PLTP	GPR149	ROBO1
	CAPS	KLC3	CSNK1D	PLTP	PKD1	TPD52L2	ARL16	KLC3	PBX4	POL3S	PBX4	GTF3C1	PLTP	HOOK2	CBLC	PCIF1	ATP6V0C	PCIF1	CBLC	HOOK2	TSC2	ATP5D	GTF3C1	SLC17A9	DRD3	ROBO2
	MAP1S	USF2	MAFG	SULF2	ITFG3	PCIF1	TRIM47	USF2	ZNF682	C16orf53	ZNF682	ATP6V0C	SULF2	LASS4	KLC3	PLTP	ITFG3	PLTP	KLC3	LASS4	ITFG3	CAPN12	ATP6V0C	PLCG1	PLOD2	GPR149
	GIPC1	C19orf47	ARL16	POFUT1	CORO1A	PLTP	GJC1	C19orf47	MAP1S	KCTD13	CD97	PKD1	TH1L	TLE6	USF2	POFUT1	TAOK2	LAMA5	USF2	TLE6	TMEM8	PBX4	TAOK2	SLCO4A1	SHOX2	DRD3
	CD97	TMEM86B	GGA3	DIDO1	TAOK2	SULF2	TBKBP1	TMEM86B	GIPC1	MAZ	C19orf47	CORO1A	SIRPA	AES	GYS1	DIDO1	RHOT2	DIDO1	GYS1	GMIP	RHOT2	ZNF682	SETD1A	SNX21	NCBP2	PLOD2
	RAX2	CLPTM1	TRIM47	TH1L	SETD1A	DIDO1	ITGA2B	CLPTM1	CD97	LOC613037	RAX2	TAOK2	SLC17A9	PPAN-P2RY11	BAX	SLC17A9	SETD1A	ADNP	BAX	ATP5D	RHBDL1	CBLC	CDH1	ATRN	PLD1	SHOX2
	STK11	LENG8	MRPL38	SLC17A9	IFT140	TH1L	ITGB4	LENG8	RAX2	NPIPL1	ZNF331	SETD1A	PLCG1	CAPS	HPN	PLCG1	NOMO1	DDX27	HPN	PBX4	NOMO1	GYS1	C16orf86	CPNE1	GYG1	NCBP2
	MARCH2	PAK4	NPB	PLCG1	C16orf45	ARFGAP1	LRRC45	PAK4	MARCH2	ZNF768	STXBP2	IFT140	ATRN	ATP5D	TMEM86B	SLCO4A1	RNF40	ARFGAP1	TMEM86B	ZNF682	DNASE1	CD97	DOK4	TM9SF4	MINA	PLD1
	ZNF266	DYRK1B	LGALS3BP	SS18L1	RNF40	SLC17A9	SUPT6H	DYRK1B	ZNF266	LAT	MLL4	SULT1A1	ENTPD6	CALR	CLPTM1	SDC4	HBQ1	SLC17A9	CLPTM1	MAP1S	IL32	BAX	FAM38A	ProSAPiP1	EVI1	GYG1
	BSG	CYP2S1	FOXK2	C20orf117	SULT1A1	PLCG1	RHBDF2	CYP2S1	C19orf43	ZNF646	GRIK5	C16orf86	SNPH	MAP1S	LENG8	SNX21	HBA2	SLCO4A1	LENG8	GIPC1	HBQ1	AP1M2	DHX38	ZMYND8	NEK11	MINA
	OLFM2	ZNF331	BAIAP2	PREX1	ROGDI	SS18L1	TMEM104	ZNF331	DAPK3	CORO1A	FUT6	FAM38A	PKIG	GIPC1	PAK4	ID1	FBXL16	PLCG1	PAK4	CD97	HBA2	HPN	FBXL16	RRBP1	ETV5	EVI1
	SIN3B	CGB5	GAA	C20orf149	WFIKKN1	PREX1	ASPSCR1	CGB5	FSTL3	TAOK2	ZNF558	DHX38	C20orf108	C19orf66	DYRK1B	RIMS4	LITAF	SNX21	DYRK1B	AP1M2	FBXL16	SH2D3A	WFIKKN1	RPS21	CD47	NEK11
	C19orf43	MLL4	DUS1L	YTHDF1	C16orf42	COL9A3	MTMR4	MLL4	FLJ22184	FBRS	MYADM	WFIKKN1	PHACTR3	CD97	CYP2S1	CPNE1	WFIKKN1	RIMS4	CYP2S1	SH2D3A	HCFC1R1	ZNF493	PLLP	PRO0628	LOH3CR2A	CD47
	NACC1	GRIK5	NOTUM	PKIG	TGFB1I1	SLC35C2	JUP	GRIK5	TM6SF2	SETD1A	LSDP5	TGFB1I1	TM9SF4	AP1M2	ZNF331	L3MBTL	C16orf42	L3MBTL	ZNF331	MARCH2	LITAF	RAVER1	KCTD13	EDEM2	PARP3	LOH3CR2A
	DAPK3	RTN2	METRNL	LIME1	POL3S	WFDC2	C1QTNF1	RTN2	STXBP2	GDPD3	MYO9B	POL3S	RASSF2	SH2D3A	DMKN	C20orf149	KCTD13	COL9A3	DMKN	ZNF493	WFIKKN1	ZNF331	ASPHD1	LAMA5	UBA5	PARP3
	FSTL3	EID2B	CANT1	C20orf108	KCTD13	C20orf149	PLCD3	EID2B	C19orf50	TNRC6A	ZNF333	KCTD13	SRXN1	MARCH2	CGB5	YTHDF1	ASPHD1	SLC35C2	CGB5	ZNF266	NAT15	SLC39A3	MAPK8IP3	ADNP	ABHD14B	UBA5
	TMEM161A	EPS8L1	ITGB4	PHACTR3	CLDN6	YTHDF1	ACSF2	EPS8L1	CC2D1A	ARMC5	ZNF83	MAPK8IP3	FAM110A	PPAP2C	MLL4	DNMT3B	CLDN6	WFDC2	MLL4	RAVER1	C16orf42	DMKN	AMDHD2	ARFGAP1	HDAC11	ABHD14B
	DNM2	ARHGEF1	LRRC45	SLC9A8	MAPK8IP3	MMP9	TIMP2	ARHGEF1	XAB2	SLC6A10P	CIC	ZNF646	RRBP1	IL27RA	SFRS16	TM9SF4	MAPK8IP3	C20orf149	SFRS16	ZNF562	MGRN1	LONP1	TRAP1	TGM2	LMCD1	HRH1
	FLJ22184	MYADM	SLC38A10	TM9SF4	NPIPL1	PKIG	OSBPL7	MYADM	FUT6	RNF40	ALDH16A1	AMDHD2	VSTM2L	ZNF266	RYR1	OGFR	NPIPL1	YTHDF1	RYR1	C19orf43	CLDN6	C19orf24	RAB26	GGT7	PARP14	LMCD1
	RAB11B	OPA3	TSPAN10	OGFR	PKMYT1	LIME1	MAFG	OPA3	ZNF558	INO80E	JOSD2	TNRC6A	NKAIN4	BSG	FBXO46	MYL9	PKMYT1	MMP9	FBXO46	SLC39A3	MAPK8IP3	STXBP2	TNRC6A	SLC35C2	GTPBP8	PARP14
	STXBP2	MEIS3	ARHGDIA	MYL9	ZNF646	C20orf108	WNK4	MEIS3	LSDP5	NFATC2IP	MAST1	C16orf79	PRO0628	OLFM2	GRIK5	ZMYND8	ZNF205	ZNFX1	GRIK5	DAPK3	KREMEN2	MLL4	INO80E	PROCR	PTX3	PTX3
	C19orf50	WTIP	C17orf56	UCKL1	ZNF205	ZNFX1	POLG2	WTIP	SPPL2B	MAPK3	SFRS14	INO80E	RBM38	RAVER1	RTN2	UCKL1	AMDHD2	EEF1A2	RTN2	FSTL3	PKMYT1	SFRS16	NFATC2IP	RP4-691N24.1	ATP11B	ATP11B
	FSD1	CNOT3	RFNG	KCNQ2	AMDHD2	PHACTR3	GGA3	CNOT3	GPR108	ATXN2L	IRF2BP1	NFATC2IP	SMOX	SIN3B	EID2B	KCNS1	TRAP1	GATA5	EID2B	LONP1	ZNF205	GRIK5	MLKL	NOP56	FBLN2	FBLN2
	SAMD1	ZNF83	CBX8	ADRM1	FBRS	SLC9A8	KIAA0100	ZNF83	PIP5K1C		PRPF31	ADCY9	ARFGAP1	ZNF562	ZNF526	ADRM1	SPN	ZGPAT	ZNF526	C19orf24	AMDHD2	IRF3	SULT1A4	GATA5	TBC1D5	TATDN2
	LOC90379	CIC	SOX9	VSTM2L	TNRC6A	EEF1A2	MRPL38	CIC	TUBB4		PRKD2	LOC613037	TGM2	C19orf43	IRF3	KIAA0406	RAB26	OGFR	IRF3	TM6SF2	TRAP1	ARMC6	LOC613037	ZNF341	RASSF1	RASSF1
	CC2D1A	ALDH16A1	RHBDF2	SRC	C16orf79	JPH2	NPB	ALDH16A1	CRTC1		SPTBN4	ZNF768	RNF24	NACC1	FUT1	RPS21	TNRC6A	TNNC2	FUT1	STXBP2	RAB26	FUT6	PALB2	TRPC4AP	IRAK2	MKRN2
	EPOR	EHD2	RECQL5	NKAIN4	SLC6A10P	ZGPAT	LGALS3BP	EHD2	MYO9B		MGC24975	ZFHX3	GGT7	SLC39A3	ARHGEF1	PRO0628	SLC6A10P	ZMYND8	ARHGEF1	LPAR2	C16orf14	FUT1	PYCARD	BCL2L1	PPM1M	IRAK2
	XAB2	JOSD2	CYGB	PXMP4	ARHGDIG	OGFR	NAGLU	JOSD2	ZNF333		SGTA	SULT1A2	SLC35C2	DAPK3	NLRP12	EDEM2	ARHGDIG	ZBTB46	NLRP12	C19orf50	C16orf13	NLRP12	TMEM8	ZGPAT	FSTL1	PPM1M
	SLC35E1	BCAM	KIAA1303	PRO0628	INO80E	TNFRSF6B	DUS1L	BCAM	C19orf28		MRPL4	ARMC5	ZNF337	FSTL3	ZNF649	TPD52L2	UNKL	UCKL1	ZNF649	CC2D1A	ARHGDIG	GADD45B	SULT1A2	FAM113A	TRNT1	FSTL1
	FUT6	IRF2BP1	TMEM104	RBM38	NFATC2IP	UCKL1	NOTUM	IRF2BP1	DPP9		ANO8	ELMO3	RP4-691N24.1	TMEM161A	CNOT3	LAMA5	INO80E	ADRM1	CNOT3	XAB2	UNKL	LSDP5	GIYD1	TMEM189	ABHD5	ABHD5
	ZNF558	NAG18	ASPSCR1	TPD52L2	MAPK3	KCNQ2	CORO6	NAG18	LPPR2		TTYH1	GPR56	NOP56	DNM2	ZNF83	ADNP	NFATC2IP	RTEL1	ZNF83	ARMC6	FAM100A	ZNF649	ARMC5	TMEM189-UBE2V1	EIF5A2	EIF5A2
	SAFB2	PRPF31	SGSH	ARFGAP1	SOLH	ADRM1	METRNL	PRPF31	MAST1		FCAR	NPIP	ZGPAT	LONP1	CIC	DDX27	MAPK3	TMEM189	CIC	FUT6	PPL	CRB3	ELMO3	VISA	MYLK	PLXND1
	ADAT3	PRKD2	CYTH1	TGM2	TRAF7	RTEL1	CANT1	PRKD2	SFRS14		AES	RLTPR	FAM113A	C19orf24	JOSD2	ARFGAP1	SOLH	TMEM189-UBE2V1	JOSD2	CFD	SOLH	ZNF83	DNASE1	MMP24	TGFBR2	MYLK
	LSDP5	NAPA	TBCD	COL9A3	N-PAC	SRC	TBC1D3B	NAPA	SLC27A1		AP2A1	ABCA3	TNFRSF6B	ZNF439	BCAM	TGM2	TRAF7	CTSA	BCAM	ABCA7	TRAF7	CIC	IL32	RBCK1	P4HTM	TGFBR2
	TPM4	SPTBN4		GGT7	HAGHL	NKAIN4	SLC38A10	SPTBN4	RFX1		CAPS	C16orf53	PTPRA	STXBP2	NLRP7	COL9A3	N-PAC	RPS21	NLRP7	LSDP5	N-PAC	TLE2	NPIP	NPEPL1	MRPL3	P4HTM
	SPPL2B	ZNF574		SLC35C2	ZNF48	CTSA	STARD3	ZNF574	PKN1		CAPNS1	MAZ	VISA	C19orf50	PRKD2	GGT7	HAGHL		PRKD2	GADD45B	HAGHL	KANK3	RLTPR	POFUT1	PDCD10	BOC
	GPR108	SNRNP70		WFDC2	TBC1D10B	CABLES2	ARHGDIA	SNRNP70	PRKCSH		STK11	KREMEN2	CABLES2	SAMD1	NAPA	SLC35C2	MMP25		NAPA	CRB3	MMP25	JOSD2	C16orf53	OVOL2	ARL6IP5	MRPL3
	PIP5K1C	TTYH1		MMP9	ADCY9		C17orf56	TTYH1	MGC24975		TBC1D17	C16orf74	RBCK1	LOC90379	COX7A1	WFDC2	TSC2		COX7A1	SPPL2B		FBN3	MAZ	DIDO1	MITF	GPD1L
	NFIX	FCAR		ZNFX1	TSC2		RFNG	FCAR	UPF1		PPP1R13L	MVD	POFUT1	CC2D1A	SPTBN4	PROCR	LOC613037		SPTBN4	ZNF177		FCHO1	KREMEN2	SDC4	SEC62	PDCD10
	ZNF69	BCL3		EEF1A2	LOC613037		CBX8	BCL3	SGTA		CGB1	ZNF423	DIDO1	EPOR	CHST8	MMP9	LAT		CHST8	TUBB4		PNPLA6	C16orf74	ID1	GOLIM4	ARL6IP5
	MBD3	AP2A1		JPH2	ZNF768		SOX9	AP2A1	MRPL4		MYH14	SPIRE2	SS18L1	XAB2	ZNF574	ZNFX1	PALB2		ZNF574	CRTC1		EBI3	MVD	RIMS4	CCDC58	MITF
	JMJD2B	CAPNS1		ZGPAT	LAT		KIAA1303	CAPNS1	ANO8		NACC1	SLC38A7	C20orf117	ARMC6	SNRNP70	EEF1A2	PYCARD		SNRNP70	TLE2		SFRS14	CDIPT	L3MBTL	ATG7	SEC62
	TUBB4	WDR62		DLGAP4	SULT1A2		WSB1	WDR62	AES		RINL	CHMP1A	PREX1	SCAMP4	ZNF350	GATA5	TMEM8		ZNF350	KANK3		CHERP	CES3	C20orf149	CAMK1	GOLIM4
	ZNF557	ZNF580		TNFRSF6B	GDPD3		SGSH	ZNF580	CAPS		CADM4	ITFG3	C20orf149	SLC35E1	PPP1R14A	ZNF341	SULT1A2		PPP1R14A	C19orf28		PRKD2	PHKG2	YTHDF1	TTLL3	FBXL2
	CRTC1	TBC1D17		RTEL1	ARMC5		SC65	TBC1D17	FKBP8		DNM2	KIAA0895L	YTHDF1	FUT6	FCAR	TRPC4AP	GIYD1		FCAR	FBN3		COX7A1	SLC38A7	DNMT3B	RBMS3	CAMK1
	PCSK4	PPP1R13L		CTSA	RHBDL1		SPHK1	PPP1R13L	STK11		ZNF430	SALL1	LIME1	SAFB2	TMEM149	BCL2L1	PLA2G10		TMEM149	FCHO1		DAZAP1	ITFG3	STK35	RFTN1	NCK1
	MYO9B	MBOAT7		CABLES2	NPIP		SSTR2	MBOAT7	OLFM2		ISOC2	C16orf45	SLC9A8	CFD	AP2A1	ZGPAT	GDPD3		AP2A1	TJP3		SPTBN4	DBNDD1	OGFR	ZBTB20	TTLL3
	ZNF333	CGB1			MVP		C1QL1	CGB1	BSG		SYMPK	RNF40	C20orf29	ADAT3	CAPNS1	DLGAP4	ARMC5		CAPNS1	DOCK6		SGTA	RHOT2	MYL9	DTX3L	RBMS3
	C19orf28	MYH14			ATXN2L		SLFN12	MYH14	SIN3B		RAB11B	CENPT	FKBP1A	ABCA7	ZNF761	TNNC2	RHBDL1		ZNF761	PNPLA6		MRPL4	NOMO1	UCKL1	ABHD14A	RFTN1
	SIRT6	RINL			HCFC1R1		VTN	RINL	NACC1		DMPK	ROGDI	OGFR	GADD45B	YIF1B	ZBTB46	DNASE1		YIF1B	EBI3		ANO8	RNF40	KCNS1	LOC401052	ZBTB20
	DPP9	CADM4			IL4R		GRB7	CADM4	TMEM161A		DMWD	COTL1	MYL9	LSDP5	SPINT2	RTEL1	IL32		SPINT2	SFRS14		FCAR	CENPT	ADRM1	SLC9A9	DTX3L
	ZNF791	ERF			NAT15		G6PC3	ERF	ZNF430		KCNN4	FTO	UCKL1	CRB3	WDR62	TMEM189	NPIP		WDR62	CHERP		TMEM149	HBQ1	KIAA0406	NMD3	ABHD14A
	C19orf60	ISOC2			ABCA3		BZRAP1	ISOC2	DNM2		STRN4	ACD	KCNQ2	RNF126	ZNF580	TMEM189-UBE2V1	ATXN2L		ZNF580	ARRDC2		AES	COTL1	TPD52L2	ANAPC13	LOC401052
	LPPR2	SYMPK			MGRN1		RSAD1	SYMPK	RAB11B		ITPKC	C16orf42	ADRM1	TPM4	TBC1D17	CTSA	HCFC1R1		TBC1D17	RFX1		AP2A1	HBA2	DDX27	RTP4	SLC9A9
	KIAA1543	KCNK6			C16orf53		MRC2	KCNK6	FSD1		CYTH2	LCAT	SRC	SPPL2B	PPP1R13L		NAT15		PPP1R13L	PKN1		CAPS	LITAF	FERMT1	STAC	TTC14
	MAST1	DMPK			MAZ		TSPAN10	DMPK	SAMD1		SAFB2	CLDN6	PXMP4	ZNF177	CGB1		MGRN1		CGB1	DAZAP1		CAPNS1	ACD	SLC4A11	TEX264	NMD3
	ZNF414	DMWD			ABCC1		TRAF4	DMWD	LOC90379		TPM4	TUBB3	TPD52L2	NFIX	MYH14		C16orf53		MYH14	PRKCSH		YIF1B	C16orf42	COL9A3	TBL1XR1	ANAPC13
	MIER2	KCNN4			KREMEN2		HAP1	KCNN4	EPOR		MBD3	NPIPL1	COL9A3	ZNF69	RASIP1		MAZ		RASIP1	UPF1		CALR	LCAT	WFDC2	SSR3	RTP4
	CNN2	STRN4			NSMCE1		CDK5RAP3	STRN4	SLC35E1		JMJD2B	NPIPL2	WFDC2	TUBB4	RINL		KREMEN2		RINL	SGTA		C19orf66	CLDN6	ACSS1	ACAP2	STAC
	CNN1	ITPKC			C16orf13		RECQL5	ITPKC	SAFB2		PCSK4	PKMYT1	ACSS1	ZNF557	ERF		SH2B1		ERF	ZNF93		TBC1D17	NPIPL1	MMP9	ZNF385D	TEX264
	C19orf6	CYTH2			WDR90		FKBP10	CYTH2	ADAT3		ACTN4	ZNF205	MMP9	CRTC1	ISOC2		C16orf14		ISOC2	MRPL4		PPP1R13L	NPIPL2	PYGB	LRRFIP2	SSR3
	DOHH	ADCK4			FAM100A		CYTH1	ADCK4	TPM4		MAN2B1	FBRS	PYGB	ILF3	SYMPK		CDIPT		SYMPK	ANO8		PPAP2C	PKMYT1	ZNFX1	PHLDB2	ACAP2
	PALM	RBM42			PPL		DLX3	RBM42	NFIX		PPP1R12C	CPNE7	ZNFX1	STAP2	KCNK6		C16orf13		KCNK6	AES		CGB1	ZNF205	EEF1A2	WNT5A	ZNF385D
	SLC27A1	NLRP2					TBX2	NLRP2	ZNF69		PLEKHG2	SLC6A10P	EEF1A2	TLE2	DMWD		FAM100A		DMWD	PPAN-P2RY11		MYH14	MARVELD3	MCM8	ABHD10	LRRFIP2
	RFX1	NFKBIB					KCNJ2	NFKBIB	MBD3		VASP	ARHGDIG	MCM8	KANK3	KCNN4		PHKG2		KCNN4	CAPS		NACC1	CPNE7	DLGAP4	PIGZ	PHLDB2
	RGL3	LSR					TBCD	LSR	JMJD2B		CNN2	MAPK3	JPH2	C19orf28	STRN4		PPL		STRN4	CALR		RINL	SPN	TNNC2	GOLGB1	WNT5A
	PRKCSH	MED25					TBC1D3G	MED25	ZNF557		CNN1	SOLH	DLGAP4	FBN3	ADCK4				ADCK4	C19orf66		DNM2	SLC6A10P	C20orf96	IGSF11	ABHD10
	MGC24975	ACTN4					SEZ6	ACTN4	PCSK4		C19orf6	TRAF7	C20orf3	FCHO1	RBM42				RBM42	FKBP8		ZNF430	ARHGDIG	ZBTB46	TMEM115	PIGZ
	SYDE1	PPP1R12C					NKIRAS2	PPP1R12C	ZNF91		DOHH	N-PAC	C20orf96	MATK	FXYD5				FXYD5	PPAP2C		ISOC2	UNKL	RTEL1	GLT8D1	ACTR8
	C19orf29	PLEKHG2					MBTD1	PLEKHG2	SIRT6		CLEC11A	HAGHL	RTEL1	ZNF791	HSPB6				HSPB6	IL27RA		SYMPK	MAPK3	ABHD12	C3orf54	EDEM1
	UPF1	PLEKHA4					CSNK1D	PLEKHA4	ZNF791		C19orf29	ZNF48	CTSA	TJP3	SELV				SELV	OLFM2		ZNF439	SOLH	CTSA	FAM55C	GOLGA4
	SGTA	VASP					ANKRD13B	VASP	C19orf60		SCAF1	TBC1D10B		DOCK6	NLRP2				NLRP2	BSG		DMWD	TRAF7		RAB7A	GOLGB1
	AMH	POLD1					VAT1	POLD1	KIAA1543		LMTK3	TSC2		POLRMT	NFKBIB				NFKBIB	SIN3B		KCNN4	N-PAC		MASP1	IGSF11
	MRPL4	ZNF579					FOXK2	ZNF579	ZNF414		APLP1	CES2		C19orf60	C19orf33				C19orf33	NACC1		STRN4	HAGHL		SLC33A1	TMEM115
	ANO8	PVRL2					BAIAP2	PVRL2	MIER2		LTBP4	LAT		KIAA1543	LSR				LSR	TMEM161A		SAFB2	MMP25		VGLL3	GLT8D1
		CLEC11A					GAA	CLEC11A	CNN2		LASS1	GDPD3		PNPLA6	MED25				MED25	ZNF430		ZNF431	IL34		CRTAP	C3orf54
		SCAF1					EPN3	SCAF1	CNN1		MAP1S	FA2H		EBI3	NCCRP1				NCCRP1	DNM2		HSPB6	TSC2		FYCO1	FAM55C
		CCDC9					KCNH6	MEGF8	C19orf6		KLC3	SLC7A6		ZNF414	SLC7A10				SLC7A10	ZNF439		TPM4	CES2		MBNL1	RAB7A
		ZNF577					GHDC	CCDC9	DOHH		USF2	RHBDL1		REEP6	ACTN4				ACTN4	SAMD1		C19orf33	LAT		GRAMD1C	MASP1
		C19orf63					CYGB	ZNF577	PALM		GIPC1	MVP		MIER2	PPP1R12C				PPP1R12C	LOC90379		NCCRP1	PLA2G10		ABTB1	CIDECP
		LMTK3					RAB5C	C19orf63	DDX49		TMEM86B	ATXN2L		CHERP	PLEKHG2				PLEKHG2	EPOR		SLC7A10	GDPD3		PDZRN3	SLC33A1
							CROP	LMTK3	RGL3		MARCH2	HCFC1R1		CNN2	VASP				VASP	SCAMP4		ACTN4	FA2H		SEMA3B	VGLL3
							PHF12		SYDE1		CLPTM1	IL4R		CNN1	SIPA1L3				SIPA1L3	SLC35E1		MAN2B1	SLC7A6		NLGN1	CRTAP
									C19orf29		ZNF266	NAT15		C19orf22	POLD1				POLD1	SAFB2		MATK	GAS8		COL8A1	FYCO1
									AMH		LENG8	MGRN1		ARRDC2	ZNF579				ZNF579	ADAT3		PPP1R12C	RHBDL1		ACAD11	MBNL1
											PAK4	ABCC1		C19orf6	PVRL2				PVRL2	ZNF431		PLEKHG2	ATXN2L		ZDHHC3	GRAMD1C
											DYRK1B	NSMCE1		EIF3G	CEBPA				CEBPA	RNF126		VASP	RPL13		MUC4	ABTB1
											C19orf43	SLC9A5		DOHH	TNNT1				TNNT1	TPM4		REEP6	HCFC1R1		C3orf1	C3orf64
											CYP2S1	C16orf13		ZNF559	SCAF1				SCAF1	NFIX		SIPA1L3	NAT15		ARPM1	PDZRN3
											DAPK3	WDR90		ITGB1BP3	SLC8A2				MEGF8	ZNF69		CNN2	MGRN1		TMF1	SEMA3B
											FSTL3	FAM100A		RFX1	CCDC9				SLC8A2	ZNF557		CNN1	CES1		VHL	NLGN1
											FLJ22184	VAC14		RGL3	ZNF577				CCDC9	ZNF91		C19orf22	CDH3		RSRC1	COL8A1
											TM6SF2	PPL		DAZAP1	C19orf63				ZNF577	ILF3		C19orf6	SH2B1		ATG3	ZDHHC3
											CGB5			PRKCSH	LMTK3				C19orf63	STAP2		EIF3G	C16orf14		ZIC4	MUC4
											C19orf50			C19orf29					LMTK3	MATK		DOHH	C16orf13		SERP1	C3orf1
											RTN2			UPF1						ZNF791		ZNF559	FAM100A		CLEC3B	ARPM1
											EID2B			SGTA						POLRMT		ITGB1BP3	VAC14		HYAL2	TMF1
											EPS8L1			MRPL4						C19orf60		TNNT1	PPL		MRAS	VHL
											CC2D1A			ANO8						KIAA1543		C19orf29			COPG	ATG3
											XAB2									ZNF414		SCAF1			PIK3CA	ZIC4
											ARHGEF1									REEP6		LMTK3			APOD	CLEC3B
											OPA3									MIER2		TNFSF9			UBA7	HYAL2
											MEIS3									CNN2		TNFSF14			ARL8B	MRAS
											SPPL2B									CNN1		LASS4			UBE2E1	PIK3CA
											GPR108									C19orf22		APOC1			DHFRL1	APOD
											WTIP									C19orf6		APOE			ZNF654	UBA7
											PIP5K1C									EIF3G		GMIP			ISY1	ARL8B
											TUBB4									DOHH		MAP1S			TMEM42	DHFRL1
											CRTC1									ZNF559		KLC3			LIPH	ARL13B
											CNOT3									ITGB1BP3		USF2			ARPP-21	ZNF654
											EHD2									RGL3		GIPC1			USP4	LIPH
											BCAM									C19orf29		TMEM86B			HHATL	ARPP-21
											C19orf28											MARCH2			B3GALNT1	HHATL
											DPP9											CLPTM1			STAG1	B3GALNT1
											LPPR2											ZNF266			SLC25A20	STAG1
											NAG18											LENG8			TSC22D2	TSC22D2
											SLC27A1											PAK4			SNRK	SNRK
											RFX1											DYRK1B			RPSA	EPM2AIP1
											NAPA											ZNF562			PXK	RPSA
											PKN1											C19orf43			LAMB2	PXK
											PRKCSH											CYP2S1			NAT13	LAMB2
											UPF1											DAPK3			LXN	NAT13
											ZNF574											FSTL3			QRICH1	LXN
											SNRNP70											TM6SF2			OSBPL11	QRICH1
											BCL3											CGB5			SLC26A6	OSBPL11
											FKBP8											LPAR2			C3orf70	SLC26A6
											WDR62											C19orf50			CCDC80	C3orf70
											ZNF580											RYR1			SUMF1	DZIP1L
											BSG											FBXO46			PPP2R3A	CCDC80
											OLFM2											RTN2			PLSCR4	SUMF1
											MBOAT7											EID2B			C3orf23	PPP2R3A
											SIN3B											ZNF526			MFSD1	PLSCR4
											TMEM161A											CC2D1A			ZBTB47	MFSD1
											ERF											XAB2			FAM162A	ZBTB47
											KCNK6											CFD			CLDN18	FAM162A
											FSD1											ARHGEF1			AADACL1	CLDN18
											SAMD1											ABCA7			METTL6	AADACL1
											LOC90379											SPPL2B			FETUB	FETUB
											EPOR											ZNF177			ZBTB11	ZBTB11
											SLC35E1											TUBB4			C3orf33	C3orf33
											ADCK4											CRTC1			FAIM	FAIM
											RBM42											CNOT3			PRKAR2A	AZI2
											ADAT3											BCAM			AZI2	ZNF148
											NLRP2											C19orf28			ZNF148	FYTTD1
											NFKBIB											TJP3			FYTTD1	XRN1
											LSR											DOCK6			XRN1	ARF4
											MED25											NLRP7			ARF4	CDGAP
											NFIX											ARRDC2			SOX14	SOX14
											ZNF69											RFX1			BCL6	BCL6
											ZNF557											NAPA			ACOX2	ACOX2
											ZNF91											PKN1			C3orf18	C3orf18
											SIRT6											PRKCSH			DBR1	DBR1
											ZNF791											UPF1			ALCAM	ALCAM
											C19orf60											CHST8			FOXP1	FOXP1
											PLEKHA4											ZNF574			NR1I2	NR1I2
											KIAA1543											ZNF93			TMPPE	TMPPE
											ZNF414											SNRNP70			IL17RC	IL17RC
											MIER2											ZNF350			RARRES1	RARRES1
											POLD1											PPP1R14A			RARB	RARB
											ZNF579											PPAN-P2RY11			HLTF	RAP2B
											PVRL2											ZNF761			RAP2B	ABI3BP
											PALM											SPINT2			ABI3BP	TMEM44
											DDX49											FKBP8			TMEM44	ATP2C1
											RGL3											WDR62			ATP2C1	RASA2
											SYDE1											ZNF580			RASA2	TCTA
											MEGF8											IL27RA			TCTA	SUCLG2
											AMH											BSG			SUCLG2	DYNC1LI1
											CCDC9											OLFM2			DYNC1LI1	RPL32
											ZNF577											SIN3B			RPL32	RPL14
											C19orf63											RASIP1			RPL14	PARP9
																						TMEM161A			PARP9	DNAJC13
																						ERF			DNAJC13	SRGAP3
																						KCNK6			GATA2	GBE1
																						SAMD1			SRGAP3	UBA3
																						LOC90379			GBE1	SLC41A3
																						EPOR			UBA3	FILIP1L
																						SCAMP4			SLC41A3	TMEM43
																						SLC35E1			FILIP1L	LRRC15
																						ADCK4			TMEM43	NR1D2
																						RBM42			LRRC15	IL12A
																						ADAT3			NR1D2	IL1RAP
																						FXYD5			IL12A	RPL32P3
																						SELV			IL1RAP	FAM43A
																						RNF126			EXOG	PHC3
																						NLRP2			IL5RA	EXOG
																						NFKBIB			NKIRAS1	IL5RA
																						LSR			EIF4G1	OXSM
																						MED25			ZBTB38	NKIRAS1
																						NFIX			RNF13	EIF4G1
																						ZNF69			MGLL	ZBTB38
																						ZNF557			C3orf60	RNF13
																						ZNF91			CCRL1	MGLL
																						ILF3			ANKRD28	C3orf60
																						STAP2			OXTR	CCRL1
																						ZNF791			MME	ANKRD28
																						POLRMT			TIPARP	OXTR
																						C19orf60			DNAH1	MME
																						KIAA1543			NCKIPSD	TIPARP
																						ZNF414			TMEM45A	DNAH1
																						MIER2			CNTN3	TMEM45A
																						POLD1			IFT57	CNTN3
																						ZNF579			MRPL47	IFT57
																						PVRL2			LZTFL1	PAK2
																						CEBPA			TMPRSS7	MRPL47
																						RGL3			PPARG	PVRL3
																						MEGF8				LZTFL1
																						SLC8A2				TMPRSS7
																						CCDC9				PPARG
																						ZNF577
																						C19orf63
